# Supplementary material for: High-capacity selective uptake of cholesteryl ester from native LDL during macrophage foam cell formation
Source: PubMed Central journal article supplement — J Lipid Res. 2012 Oct;53(10):2081–91. doi: 10.1194/jlr.M026534 (PMC3435541; doi:10.1194/jlr.m026534), 2012-10

## SUPPLEMENTAL FIGURE LEGENDS

**Supplemental Figure 1. Selective CE uptake in MPMs.** Murine peritoneal macrophages (MPMs) were isolated and cultured for 2 days in DMEM supplemented with 10% FBS, 50 ng/mL M-CSF, 25 ng/mL IL-10, 50 IU/mL penicillin G and 50 µg/mL streptomycin, then treated for 4 hours with the same conditions plus 250 µg/mL [<sup>3</sup>H]Cet/<sup>125</sup>I-LDL. CE uptake was determined as described in *Materials and Methods*. Values are the mean +/- S.E.M. (n=4). \*\*\*, p<0.001 compared to [<sup>3</sup>H]Cet.

**Supplemental Figure 2. Effect of latrunculin B on LDL selective CE uptake.** BMMs were pre-treated for 30 minutes with the indicated concentration of latrunculin B in medium A, then washed and treated for 4 hours with the same addition of latrunculin B plus 250 µg/mL [<sup>3</sup>H]Cet/<sup>125</sup>I-LDL in medium B. <sup>125</sup>I-LDL uptake (**A**) and selective [<sup>3</sup>H]Cet uptake (**B**) were determined as described in *Materials and Methods*. Values are the mean of duplicate determinations.

**Supplemental Figure 3. Efflux of [<sup>3</sup>H]FC to HDL and LDL.** BMMs were labeled with 0.2 µCi/mL [<sup>3</sup>H]FC in medium A for 24 hours, then washed and equilibrated in medium B for 1 hr, then washed and treated with the indicated concentration of LDL or HDL<sub>3</sub> in medium B for 5 hours. Lipid from cells was extracted and <sup>3</sup>H from cell extracts and media was quantified. Total <sup>3</sup>H was determined as the sum of cellular and medium <sup>3</sup>H, and the percentage of the total <sup>3</sup>H present in the media was defined as percent [<sup>3</sup>H]FC efflux. Values are the mean +/- S.E.M. (n=3).

**Supplemental Figure 4. Effect of UBP on neutral CE hydrolysis.** BMMs were pulsed for 24 hours with 500 µg/mL LDL and 0.2 µCi/mL [<sup>3</sup>H]FC to induce cholesterol accumulation and to radiolabel cellular CE pools, respectively. Cells were then washed and chased for 24 hr with or without 50 µg/mL HDL<sub>3</sub> and 400 µM diethylumbelliferyl phosphate (UBP) in medium B as indicated. At the end of the experiment cell lipids were extracted and separated by TLC to determine cell-

associated [<sup>3</sup>H]CE. Values are the mean +/- S.E.M. (n=3). \*, p<0.05 compared to without HDL.

## Supplemental Figure 1

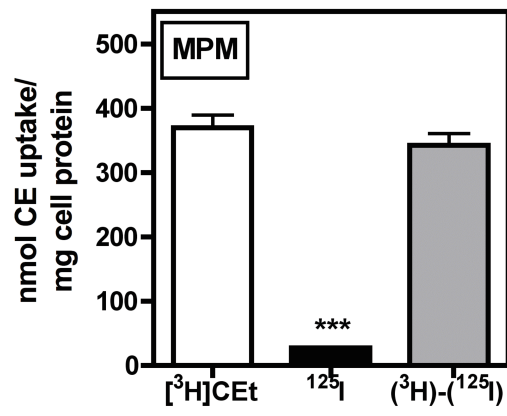

## Supplemental Figure 2

**A**

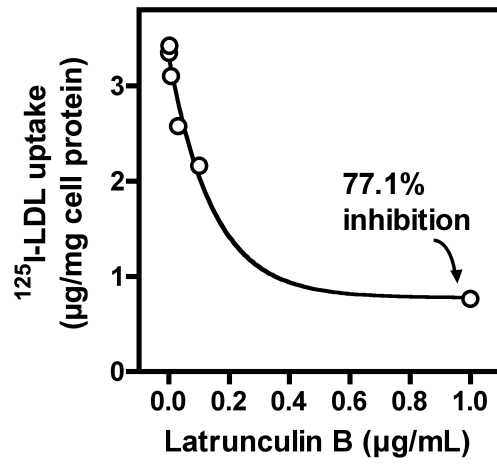

**B**

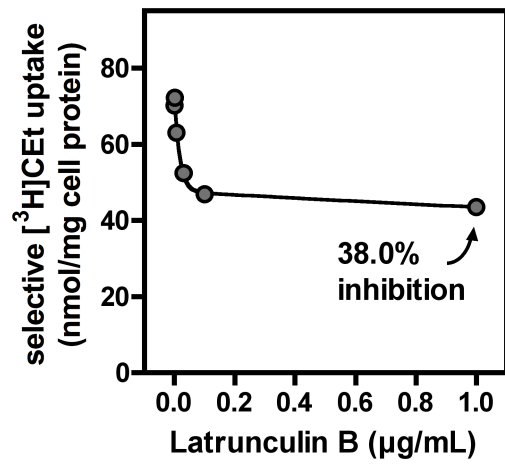

Supplemental Figure 3

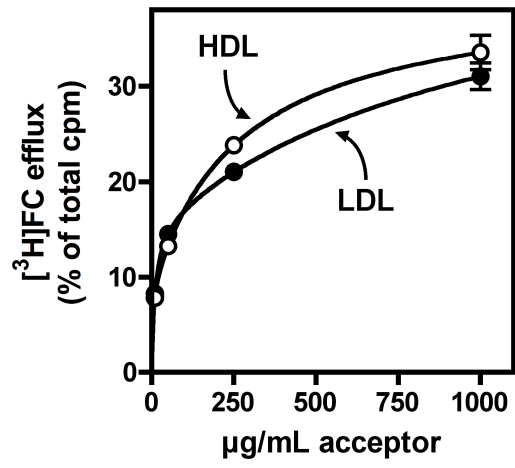

## Supplemental Figure 4

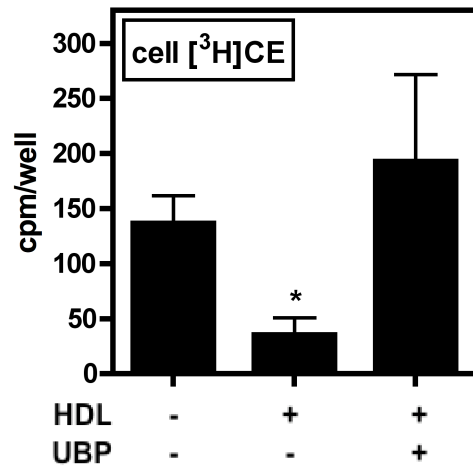

Supplement: supp_M026534_jlr.M026534-1.pdf [file supp_M026534_jlr.M026534-1.pdf]
